# Supplementary material for: Association of m.5178C&gt;A variant with serum lipid levels: a systematic review and meta-analysis
Source: Oxford University Press journal article supplement (doi:10.1042/bsr20212246), 2021-12-01
Supplement: bsr-2021-2246_supp.pdf [file bsr-2021-2246_supp.pdf]

## Supplemental Tables

**Table S1.** Characteristics of the studies included in the meta-analysis.

| First author [reference] | Year | Ethnicity | Gender | Study population                                            | Total sample size | Outcomes             |
|--------------------------|------|-----------|--------|-------------------------------------------------------------|-------------------|----------------------|
| Matsunaga H [1]          | 2001 | Japanese  | M/F    | Patients with type 2 diabetes mellitus                      | 412               | TG, TC, HDL-C        |
| Kokaze A1 [2]            | 2001 | Japanese  | M      | Healthy subjects                                            | 362               | TG, TC, LDL-C, HDL-C |
| Kokaze A2 [2]            | 2001 | Japanese  | F      | Healthy subjects                                            | 99                | TG, TC, LDL-C, HDL-C |
| Ohkubo R1 [3]            | 2002 | Japanese  | M/F    | Patients with cerebral hemorrhage or infarction             | 127               | TG, TC, HDL-C        |
| Ohkubo R2 [3]            | 2002 | Japanese  | M/F    | Healthy subjects                                            | 294               | TG, TC, HDL-C        |
| Lai S [4]                | 2005 | Chinese   | M      | Healthy subjects                                            | 211               | TG, TC, LDL-C, HDL-C |
| Gu JG [5]                | 2005 | Chinese   | M/F    | Patients with type 2 diabetes mellitus                      | 174               | TG, TC, LDL-C, HDL-C |
| Kokaze A1 [6]            | 2005 | Japanese  | M      | Healthy subjects                                            | 91                | TG, TC, HDL-C        |
| Kokaze A2 [6]            | 2005 | Japanese  | M      | Healthy subjects                                            | 138               | TG, TC, HDL-C        |
| Kokaze A3 [6]            | 2005 | Japanese  | M      | Patients with obesity                                       | 67                | TG, TC, HDL-C        |
| Song XY [7]              | 2006 | Chinese   | M/F    | Patients with type 2 diabetes mellitus                      | 1039              | TG, TC, LDL-C, HDL-C |
| Hu XM [8]                | 2010 | Chinese   | M/F    | Patients with type 2 diabetes mellitus                      | 220               | TG, TC, LDL-C, HDL-C |
| Kokaze A [9]             | 2012 | Japanese  | M      | Healthy subjects                                            | 394               | TG, TC, LDL-C, HDL-C |
| Honmyo R [10]            | 2012 | Japanese  | M      | Healthy subjects                                            | 110               | TG, LDL-C, HDL-C     |
| Li WX [11]               | 2013 | Chinese   | M/F    | Patients with type 2 diabetes mellitus                      | 448               | TG, TC, LDL-C, HDL-C |
| Yang XJ1 [12]            | 2015 | Chinese   | M/F    | Patients with type 2 diabetes mellitus and control subjects | 1894              | TG, TC, LDL-C, HDL-C |
| Yang XJ2 [12]            | 2015 | Chinese   | M/F    | Patients with type 2 diabetes mellitus                      | 1103              | TG, TC, LDL-C, HDL-C |
| Ohtsu I [13]             | 2019 | Japanese  | M      | Healthy subjects                                            | 404               | TG, TC, LDL-C, HDL-C |

M: male; F: female; TG: triglycerides; TC: total cholesterol; LDL-C: low-density lipoprotein cholesterol; HDL-C: high-density lipoprotein cholesterol.

**Table S2.** Serum lipid levels by the m.5178C>A variant.

| First author, reference | Number |     | TG, mmol/L |           | TC, mmol/L |           | LDL-C, mmol/L |           | HDL-C, mmol/L |           |
|-------------------------|--------|-----|------------|-----------|------------|-----------|---------------|-----------|---------------|-----------|
|                         | C      | A   | C          | A         | C          | A         | C             | A         | C             | A         |
| Matsunaga H [1]         | 243    | 169 | 1.78±0.88  | 1.69±1.47 | 5.02±0.6   | 4.86±0.64 | -             | -         | 1.42±0.24     | 1.42±0.27 |
| Kokaze A1 [2]           | 214    | 148 | 1.46±0.7   | 1.43±0.71 | 5.29±0.88  | 5.22±0.89 | 3.21±0.83     | 3.06±0.85 | 1.41±0.37     | 1.50±0.38 |
| Kokaze A2 [2]           | 55     | 44  | 1.23±0.52  | 0.96±0.52 | 5.72±0.83  | 5.63±0.84 | 3.51±0.77     | 3.45±0.78 | 1.65±0.41     | 1.74±0.41 |
| Ohkubo R1 [3]           | 89     | 38  | 1.4±0.52   | 1.11±0.3  | 5.44±0.95  | 4.8±1.1   | -             | -         | 1.23±0.31     | 1.15±0.4  |
| Ohkubo R2 [3]           | 164    | 130 | 1.16±0.37  | 1.27±0.44 | 5.44±0.71  | 5.66±0.74 | -             | -         | 1.52±0.37     | 1.54±0.34 |
| Lal S [4]               | 184    | 27  | 1.64±0     | 1.68±0    | 5.41±1.25  | 5.79±1.53 | 3.51±1.31     | 3.76±1.27 | 1.28±0.36     | 1.27±0.35 |
| Gu JG [5]               | 113    | 61  | 1.54±0.83  | 1.48±0.67 | 4.68±0.73  | 4.21±0.9  | 2.52±0.49     | 2.48±0.59 | 0.89±0.26     | 1.08±0.48 |
| Kokaze A1 [6]           | 55     | 36  | 1.34±0.63  | 1.15±0.63 | 5.25±0.81  | 5.29±0.82 | -             | -         | 1.54±0.46     | 1.68±0.45 |
| Kokaze A2 [6]           | 86     | 52  | 1.44±0.69  | 1.31±0.68 | 5.3±0.98   | 5.15±0.99 | -             | -         | 1.41±0.31     | 1.46±0.32 |
| Kokaze A3 [6]           | 34     | 33  | 1.59±0.72  | 1.85±0.72 | 5.26±0.8   | 5.33±0.8  | -             | -         | 1.25±0.29     | 1.3±0.3   |
| Song XY [7]             | 737    | 302 | 1.92±1.18  | 2.13±1.63 | 5.42±1.24  | 5.57±1.14 | 1.3±0.33      | 1.35±0.39 | 3.09±0.91     | 3.17±0.92 |
| Hu XM [8]               | 172    | 48  | 1.56±0.87  | 1.72±0.66 | 4.58±1.15  | 4.89±1.57 | 2.43±0.8      | 2.38±0.71 | 1.23±0.46     | 1.15±0.34 |
| Kokaze A [9]            | 239    | 155 | 1.54±1.03  | 1.58±1.03 | -          | -         | 3.14±0.9      | 3.05±0.79 | 1.41±0.35     | 1.46±0.42 |
| Honmyo R [10]           | 64     | 46  | -          | -         | 5.24±0.94  | 5.28±0.87 | 3.17±0.83     | 3.18±0.77 | 1.41±0.3      | 1.34±0.29 |
| Li WX [11]              | 348    | 100 | 2.1±1.2    | 1.8±1.2   | 4.3±0.9    | 4.3±1     | 2.4±0.8       | 2.4±0.7   | 1.2±0.3       | 1.3±0.2   |
| Yang XJ1 [12]           | 1472   | 422 | 1.57±1.32  | 1.49±1.12 | 4.65±1.14  | 4.78±1.08 | 2.66±0.87     | 2.69±0.96 | 1.24±0.4      | 1.3±0.42  |
| Yang XJ2 [12]           | 857    | 246 | 1.75±1.36  | 1.72±1.26 | 4.49±1.18  | 4.61±1.14 | 2.71±0.94     | 2.77±0.96 | 1.14±0.42     | 1.2±0.43  |
| Ohtsu I [13]            | 247    | 157 | 1.55±1.03  | 1.57±1.02 | -          | -         | 3.14±0.89     | 3.05±0.8  | 1.41±0.35     | 1.45±0.42 |

TG: triglycerides; TC: total cholesterol; LDL-C: low-density lipoprotein cholesterol; HDL-C: high-density lipoprotein cholesterol.
