# Supplementary material for: Association of m.5178C&gt;A variant with serum lipid levels: a systematic review and meta-analysis
Source: Oxford University Press journal article supplement (doi:10.1042/bsr20212246), 2021-12-01
Supplement: bsr-2021-2246_supp1.pdf [file bsr-2021-2246_supp1.pdf]

## Supplemental References

1. Matsunaga H, Tanaka Y, Tanaka M, Gong JS, Zhang J, Nomiyama T, Ogawa O, Ogihara T, Yamada Y, Yagi K, Kawamori R. Antiatherogenic mitochondrial genotype in patients with type 2 diabetes. *Diabetes Care*. 2001;24:500-503.
2. Kokaze A, Ishikawa M, Matsunaga N, Yoshida M, Sekine Y, Teruya K, Takeda N, Sumiya Y, Uchida Y, Takashima Y. Association of the mitochondrial DNA 5178 A/C polymorphism with serum lipid levels in the Japanese population. *Hum Genet*. 2001;109:521-525.
3. Ohkubo R, Nakagawa M, Ikeda K, Kodama T, Arimura K, Akiba S, Saito M, Ookatsu Y, Atsuchi Y, Yamano Y, Osame M. Cerebrovascular disorders and genetic polymorphisms: mitochondrial DNA5178C is predominant in cerebrovascular disorders. *J Neurol Sci*. 2002;198:31-35.
4. Lal S, Madhavan M, Heng CK. The association of mitochondrial DNA 5178 C > a polymorphism with plasma lipid levels among three ethnic groups. *Ann Hum Genet*. 2005;69:639-644.
5. Gu JG, Zhou X, Li X, Li D, Liu SH, Hu PP. Association of the Mitochondrial DNA5178A / C Polymorphism with Serum Lipid Levels in Patients with Type2Diabetes Mellitus. *Journal of new medical knowledge*. 2015; 15:40-44.
6. Kokaze A, Ishikawa M, Matsunaga N, Yoshida M, Makita R, Satoh M, Teruya K, Sekiguchi K, Masuda Y, Harada M, Uchida Y, Takashima Y. Longevity-associated mitochondrial DNA 5178 C/A polymorphism is associated with fasting plasma glucose levels and glucose tolerance in Japanese men. *Mitochondrion*. 2005;5:418-425.
7. Song XY, Lu B, Dong XH, Ding D, Hu RM. Association of the mitochondrial DNA 5178 A/C polymorphism with diabetic nephropathy in Chinese type 2 diabetic patients. *Fudan Univ J Med Sci*. 2006; 33: 479-482.
8. Hu XM, Lv JX. Study on the association of the mitochondrial DNA5178C / A polymorphism with type2diabetes mellitus. *Lab Med Clin*. 2010; 7: 1820-1822.
9. Kokaze A, Ishikawa M, Matsunaga N, Karita K, Yoshida M, Ohtsu T, Ochiai H, Shirasawa T, Saga N, Hoshino H, Takashima Y. Combined effect of longevity-associated mitochondrial DNA 5178 c/a polymorphism and green tea consumption on risk of hypertension in middle-aged Japanese men. *Hum Biol*. 2012;84:307-318.
10. Honmyo R, Kokaze A, Karita K, Yoshida M, Ishikawa M, Ohno H. Influence of mitochondrial DNA 5178 C/A polymorphism on serum cholesterol changes: a short-term follow-up in middle-aged Japanese men. *Environ Health Prev Med*. 2012;17:401-407.
11. Li WX, Wu H, Lv JX. Assessment of mitochondrial DNA ND2 gene C5178A polymorphism for cerebral-cardiovascular complications in patients with type 2 diabetes mellitus. *Clin J Lab Med*. 2013; 36: 519-522.
12. Yang X, Zhang Y, Ma Y, Zhao Q, Lyu J. Effect of mitochondrial DNA 5178 C/A polymorphism on risks for type 2 diabetes mellitus and its complications. *Zhonghua Yi Xue Yi Chuan Xue Za Zhi*. 2015;32:855-860.
13. Ohtsu I, Ishikawa M, Matsunaga N, Karita K, Yoshida M, Ochiai H, Shirasawa T, Yoshimoto T, Minoura A, Sai S, Kokaze A. Longevity-associated mitochondrial DNA 5178 C/A polymorphism modifies effect of aging on renal function in male Japanese health checkup examinees: an exploratory cross-sectional study. *J Physiol Anthropol*. 2019;38:12.
